# Supplementary material for: Diketopiperazines, promising anti-adhesion metabolites of Glycomyces sediminimaris against dental pathogen Streptococcus mutans
Source: Research Square preprint supplement (doi:10.21203/rs.3.rs-1455351/v2), 2022-04-05
Supplement: Supplementary file 1 [file 5442c3dce2aa8a1033c3105c.docx]

Figures and Tables in online appendices [Supplementary Information (SI)]

**Table 1S** The dereplication results of the extract of *Glycomyces sediminimaris*

| m/z | Rt (min) | Molecular formula | Compound |
| --- | --- | --- | --- |
| 261.1232 | 12.3 | C14H16N2O3 | 6 |
| 197.1286 | 12.4 | C10H16N2O2 | 4 |
| 219.1131 | 13.0 | C12H14N2O2 | 8 |
| 211.1444 | 13.9 | C11H18N2O2 | 1 |
| 211.1445 | 14.2 | C11H18N2O2 | 2 |
| 245.1289 | 14.6 | C14H16N2O2 | 3 |
| 284.1395 | 14.8 | C16H17N3O2 | 7 |
| 185.1288 | 15.0 | C9H16N2O2 | 5 |
| 213.1600 | 16.8 | C11H20N2O2 | 9 |


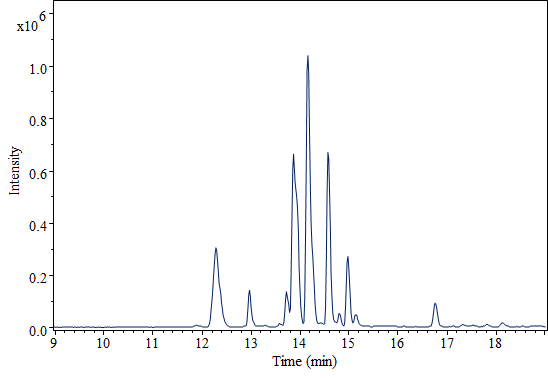


**Fig. 1S** UHPLC-ESI-Q-TOF-MS spectrum of *Glycomyces sediminimaris* extract
